# Supplementary material
Source: bioRxiv or medRxiv preprint supplement (https://www.biorxiv.org/highwire/filestream/49291/field_highwire_adjunct_files/1/165902-2.pdf)
Supplement: Supplementary file [file 165902-2.pdf]

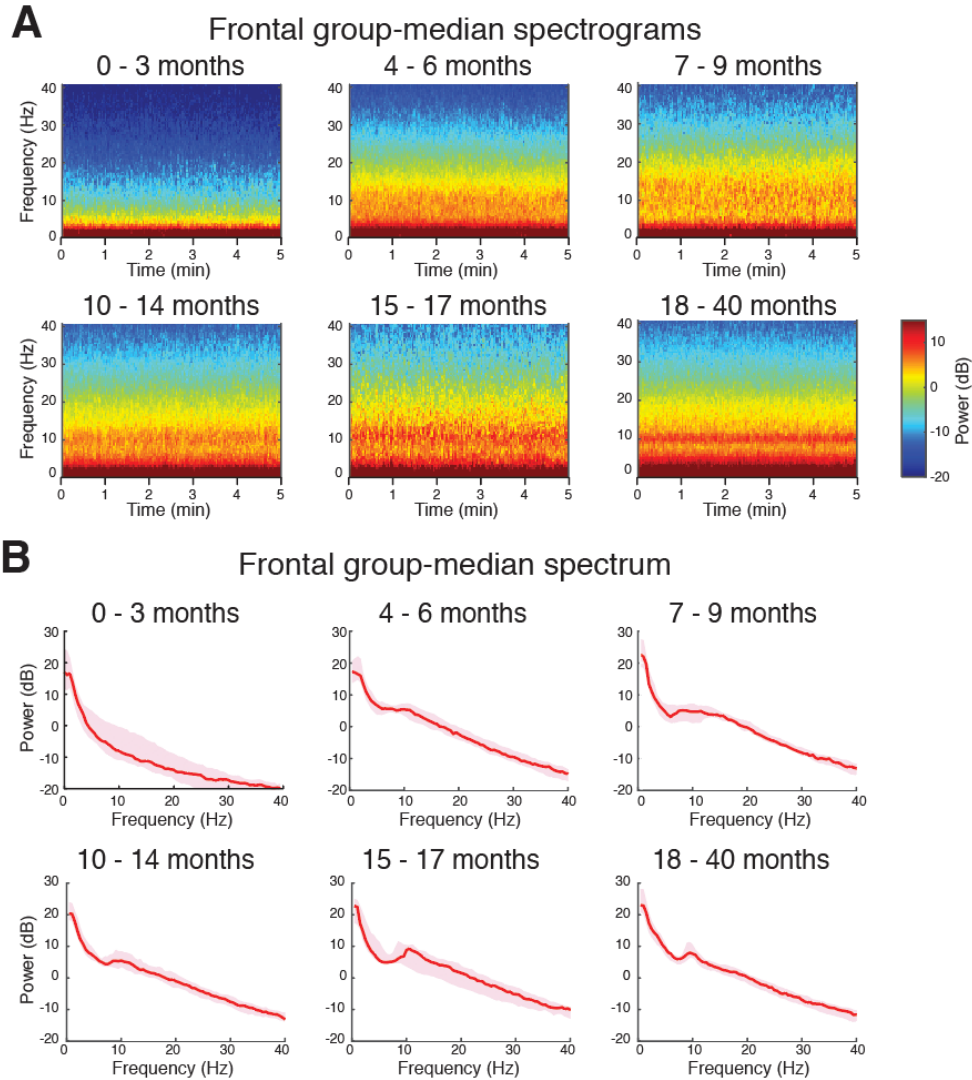

**Figure 2 – figure supplement 1.** Frontal EEG spectral properties across age-groups.

Frontal group-averaged (A) power spectrograms and (B) power spectra across all frequencies in children from 0-3 (n=17), 4-6 (n=23), 7-9 (n=7), 10-14 (n=18), 15-17 (n=7) and 18-40 (n=19) months of age. For power spectra: solid line, median; shaded area, 25<sup>th</sup>-75<sup>th</sup> percentile. F7 electrode presented using nearest neighbor Laplacian referencing. Epoch size of 5 minutes is used.
